# Supplementary material for: Zr-doped heterostructure interface to tune the electronic structure of bi-functional electrocatalysts for water splitting
Source: Royal Society of Chemistry journal article supplement (doi:10.1039/d4cy00642a), 2024-01-01
Supplement: d4cy00642a1.pdf [file d4cy00642a1.pdf]

**Electronic Supplementary Material (ESI) for Catalysis Science & Technology.**

**This journal is © The Royal Society of Chemistry 2024**

**Electronic Supplementary Information (ESI)**

**Zr-doped heterostructure interface to tune the electronic structure of bi-functional electrocatalysts for water splitting**

Mst Zakia Sultana,<sup>a</sup> Jing Liu,<sup>a</sup> Dongcheng Lin,<sup>a</sup> Qin Xu,<sup>a</sup> Ziang Xu,<sup>a</sup> Maobin Pang,<sup>a</sup> Yihan Zhen,<sup>a</sup> Peican Wang,<sup>a</sup> Lei Wan,<sup>a</sup> Shuai Shuai Yan,<sup>a</sup> and Baoguo Wang,<sup>\*a</sup>

<sup>a</sup> The State Key Laboratory of Chemical Engineering, Department of Tsinghua University, Beijing 100084, People's Republic of China. Email: [bgwang@tsinghua.edu.cn](mailto:bgwang@tsinghua.edu.cn) (BG.Wang).

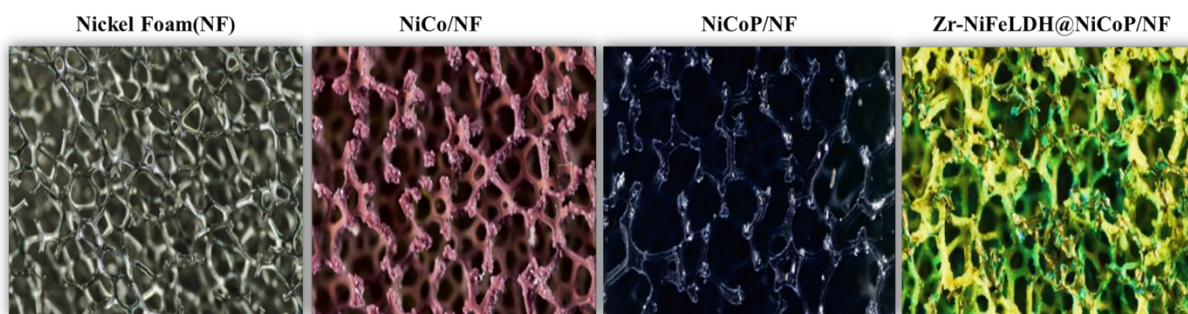

**Fig. S1.** The microscopic images of (a) Nickel Foam (NF), (b) NiCo/NF, (c) NiCoP/NF, (d) Zr-NiFeLDH@NiCoP/NF.

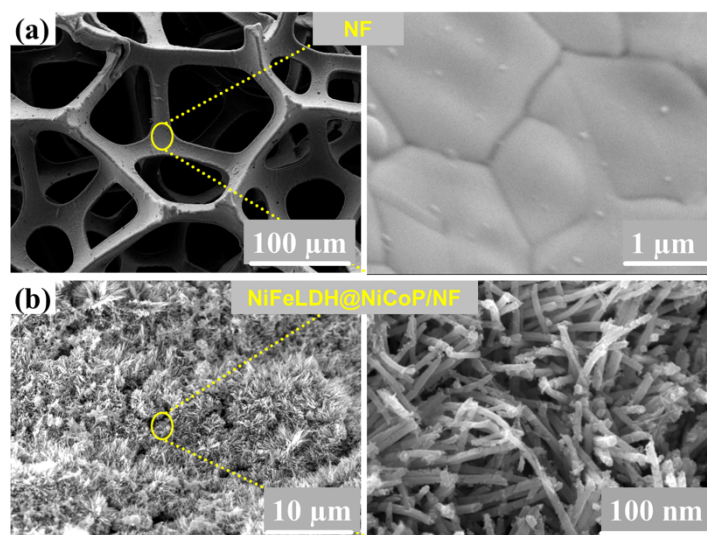

**Fig. S2.** The SEM images of (a) NF and (b) NiFe LDH@NiCoP/NF.

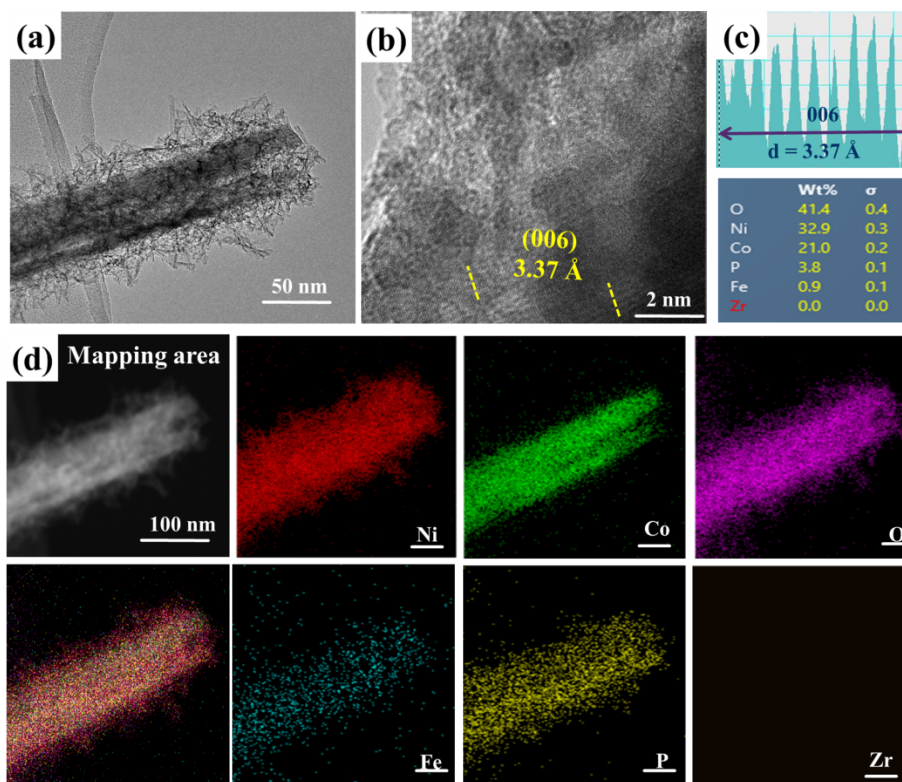

**Fig. S3.** TEM images of NiFeLDH@NiCoP/NF with EDX elemental mapping. (a) TEM image of the NiFeLDH@NiCoP/NF, (b) HRTEM image of the NiFeLDH@NiCoP/NF, (c) Corresponding intensity line profile of interplanar crystal spacing, (d) EDX elemental mapping images of the NiFeLDH@NiCoP/NF.

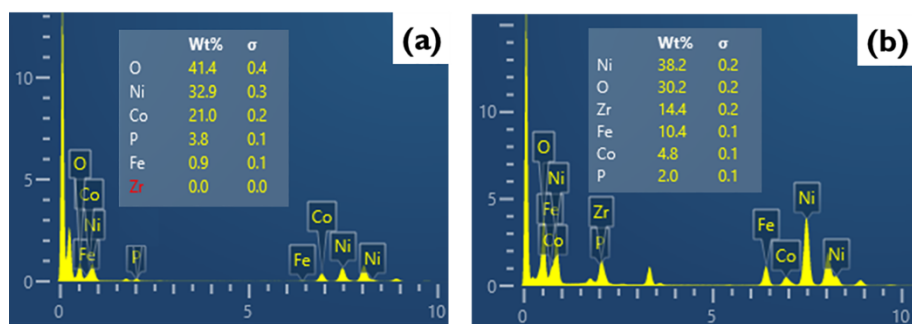

Fig. S4. EDX spectrum of the as prepared (a) NiFeLDH@NiCoP/NF and (b) Zr-NiFeLDH@NiCoP/NF.

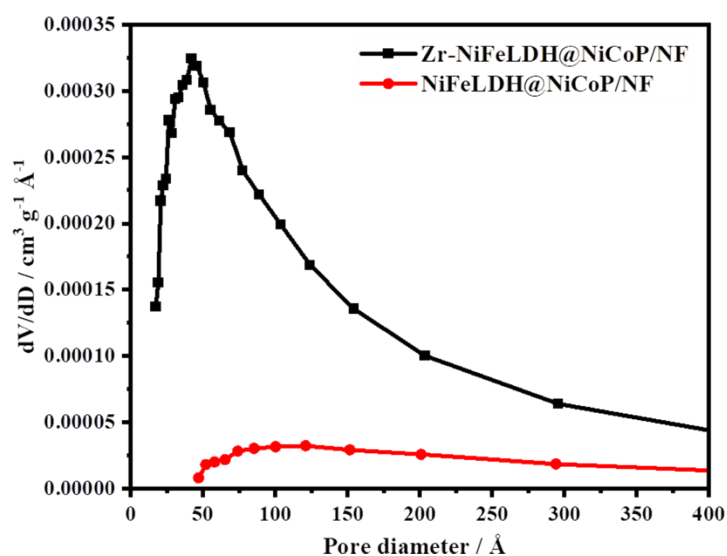

Fig. S5. Pore size distribution of Zr-NiFeLD@NiCoP/NF and NiFeLD@NiCoP/NF.

Table S1. Elemental analysis of all present metals by ICP-OES.

| Sample              | Co (mg) | P (mg) | Zr ( $\mu\text{g}$ ) | Fe ( $\mu\text{g}$ ) |
|---------------------|---------|--------|----------------------|----------------------|
| NiFeLDH@NiCoP/NF    | 22.745  | 1.102  | -                    | 88.988               |
| Zr-NiFeLDH@NiCoP/NF | 24.828  | 1.753  | 2.042                | 68.631               |

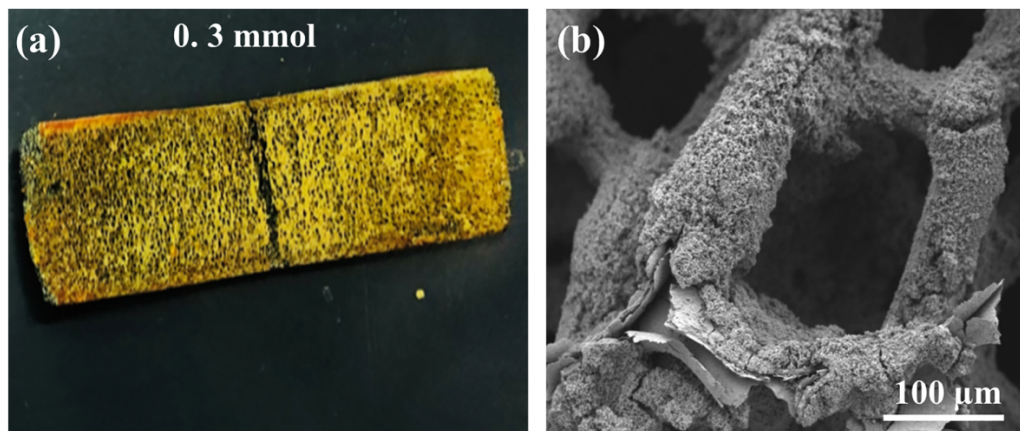

Fig. S6. Electrocatalysts with high concentrations of  $\text{ZrCl}_4$  decrease mechanical strength, (a) digital image and (b) SEM image.

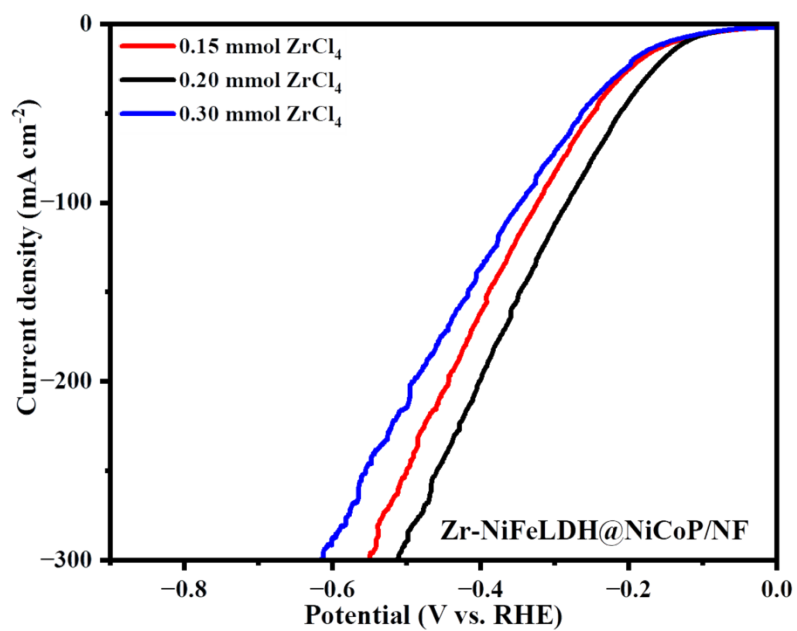

Fig. S7. The HER LSV curves of  $\text{Zr-NiFeLDH@NiCoP/NF}$  with various ratios.

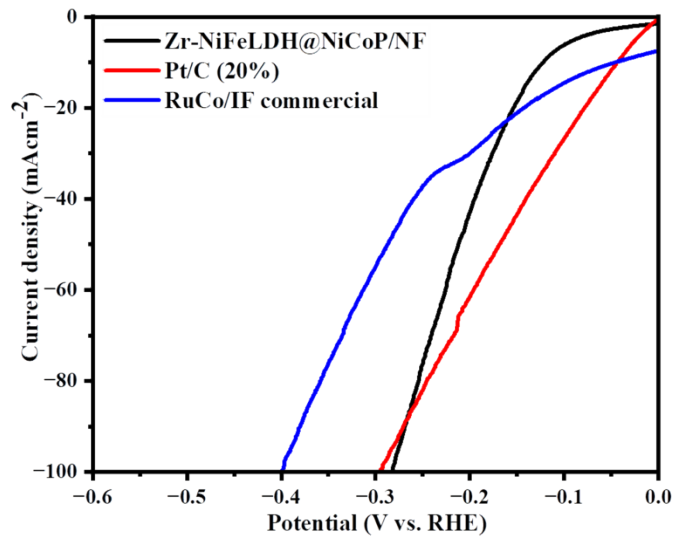

Fig. S8. The HER polarization curves of the Zr-NiFeLDH@NiCoP/NF, Pt/C (20%) and RuCo/IF.

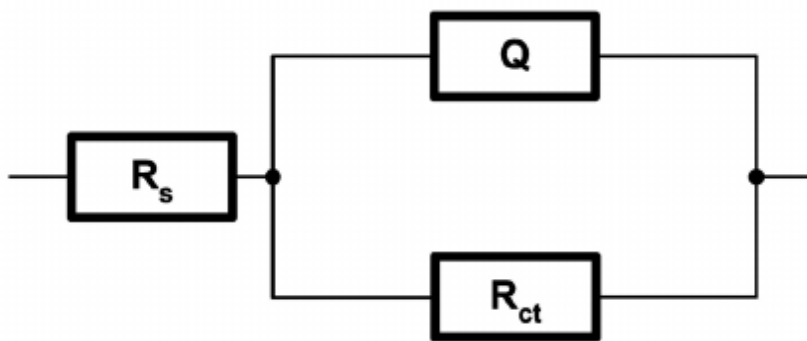

Fig. S9. The equivalent circuit diagram used for analysis of the EIS curves measured for the HER and the OER.

**Table S2.** Summary of the EIS results fitted to the equivalent circuit board as shown in Figure S9.

| Sample                                          | Reaction  | $R_{ct}(\Omega)$ |
|-------------------------------------------------|-----------|------------------|
| This work                                       | HER & OER | 0.496 & 0.32     |
| NiFeLDH@NiCoP/NF                                | HER & OER | 2.77 & 0.41      |
| IrFe@Fe <sub>3</sub> O <sub>4</sub> @NiFeLDH/IF | HER & OER | 2.34 & 2.44      |
| Zr <sub>0.1</sub> Ni <sub>1.9</sub> P/NF        | HER & OER | 5 & 8            |
| NiFexP@NiCo-LDH/CC                              | OER       | 3                |
| NiSe@NiFe-LDH/NF                                | OER       | 0.31             |
| RuO <sub>2</sub> /NiFeLDH/NF                    | HER &OER  | 6.25 & 1.55      |
| FeNi <sub>3</sub> /NiFeO <sub>x</sub>           | HER       | 2                |

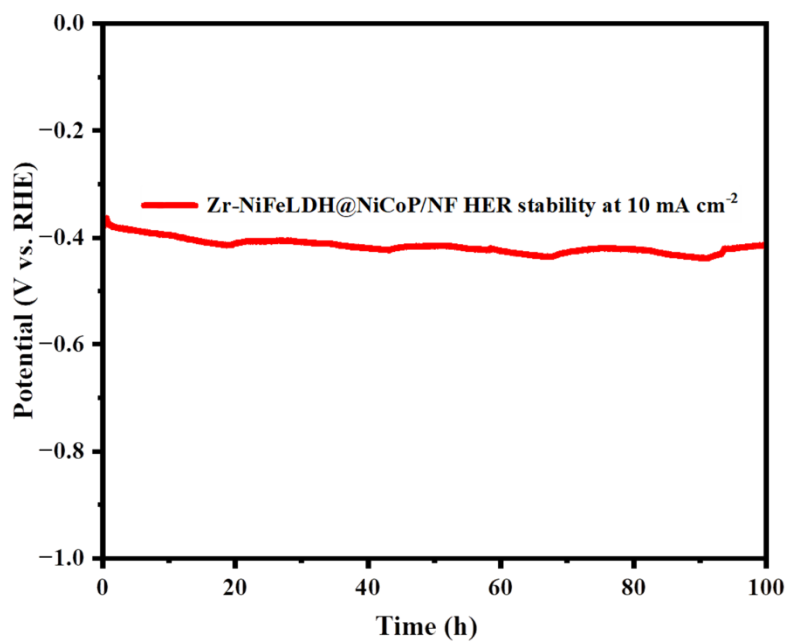

**Fig. S10.** The Zr-NiFeLDH@NiCoP/NF HER potential stability test at 10 mA cm<sup>-2</sup> for 100 h.

**Table S3.** Comparison of HER performance for Zr-NiFeLDH@NiCoP/NF with other reported electrocatalysts in the alkaline media.

| Catalyst                                                               | Electrolyte   | $\eta_{10}$ (mV) | Tafel Slope<br>(mV/dec) | Stability (h)                                  | Ref.             |
|------------------------------------------------------------------------|---------------|------------------|-------------------------|------------------------------------------------|------------------|
| <b>Zr-NiFeLDH@NiCoP/NF</b>                                             | <b>1M KOH</b> | <b>122</b>       | <b>102.2</b>            | <b>100(j<sub>10</sub> and j<sub>500</sub>)</b> | <b>This work</b> |
| 3DOM-Ni <sub>2</sub> P/Fe <sub>x</sub> P                               | 1M KOH        | 106              | 81                      | 16(j <sub>10</sub> )                           | S <sup>1</sup>   |
| CoMnP/Ni <sub>2</sub> P/NiFe                                           | 1M KOH        | 87               | 95                      | -                                              | S <sup>2</sup>   |
| Zr <sub>0.1</sub> Ni <sub>1.9</sub> P/NF                               | 1M KOH        | 68               | 79                      | 100(j <sub>10</sub> and j <sub>100</sub> )     | S <sup>3</sup>   |
| Ni <sub>2</sub> P/NiMoP <sub>2</sub> /CC                               | 1M KOH        | 102              | 84                      | 28(j <sub>10</sub> )                           | S <sup>4</sup>   |
| Zr-NiCoLDH/NF                                                          | 1M KOH        | 159              | 132.7                   | 35(j <sub>10</sub> )                           | S <sup>5</sup>   |
| NiFe <sub>x</sub> P@NiCo-LDH/CC                                        | 1M KOH        | 100              | 116                     | -                                              | S <sup>6</sup>   |
| Co <sub>4</sub> S <sub>3</sub> -NiCo LDH/CC                            | 1M KOH        | 124              | 107                     | 20(j <sub>10</sub> )                           | S <sup>7</sup>   |
| W-FeNi <sub>2</sub> S <sub>4</sub> /Ni <sub>3</sub> S <sub>2</sub> /NF | 1M KOH        | 93               | 109.7                   | -                                              | S <sup>8</sup>   |
| NiFeZn LDH                                                             | 1M KOH        | 154              | 103.5                   | 10(j <sub>10</sub> )                           | S <sup>9</sup>   |
| Ni <sub>2</sub> P@FePO <sub>x</sub>                                    | 1 M KOH       | 75               | 67                      | 25(j <sub>10</sub> )                           | S <sup>10</sup>  |
| RuO <sub>2</sub> /NiFeLDH/NF                                           | 1 M KOH       | 99               | 154.2                   | 12(j <sub>10</sub> & 50)                       | S <sup>11</sup>  |
| NiFe-LDH/MoS <sub>2</sub> -Ni <sub>3</sub> S <sub>2</sub> /NF          | 1 M KOH       | 79               | 62.4                    | 24(j <sub>10</sub> )                           | S <sup>12</sup>  |
| FeNi <sub>3</sub> /NiFeO <sub>x</sub>                                  | 1 M KOH       | 99               | 45                      | 4 (j <sub>25</sub> )                           | S <sup>13</sup>  |
| NiFe LDH/NiCo <sub>2</sub> O <sub>4</sub> /NF                          | 1 M KOH       | 192              | 59                      | 10(j <sub>45</sub> )                           | S <sup>14</sup>  |
| Co <sub>0.4</sub> Fe <sub>0.6</sub> LDH/g-CN <sub>x</sub>              | 1 M KOH       | 270              | 79                      | 24(j <sub>10</sub> )                           | S <sup>15</sup>  |
| Cu@CoFe LDH                                                            | 1 M KOH       | 171              | 36.4                    | 30(j <sub>20</sub> )                           | S <sup>16</sup>  |

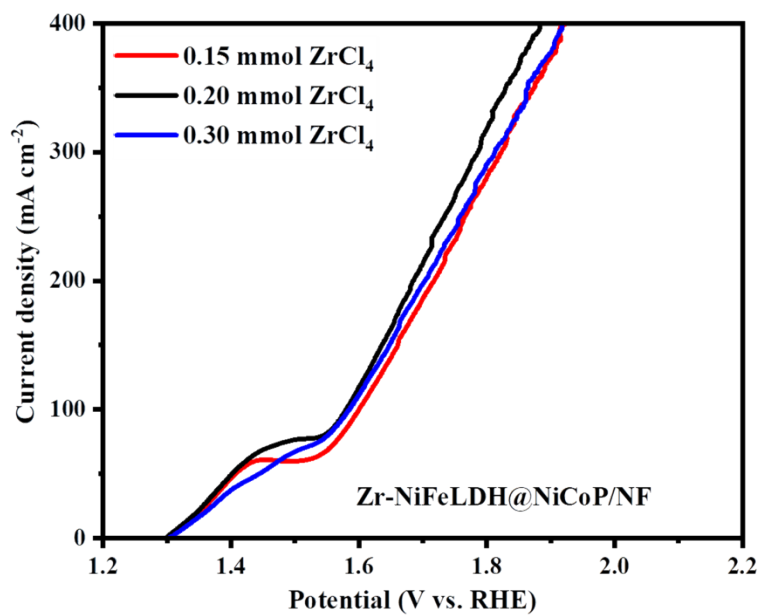

Fig. S11. OER LSV curves of Zr-NiFeLDH@NiCoP/NF with various ratios.

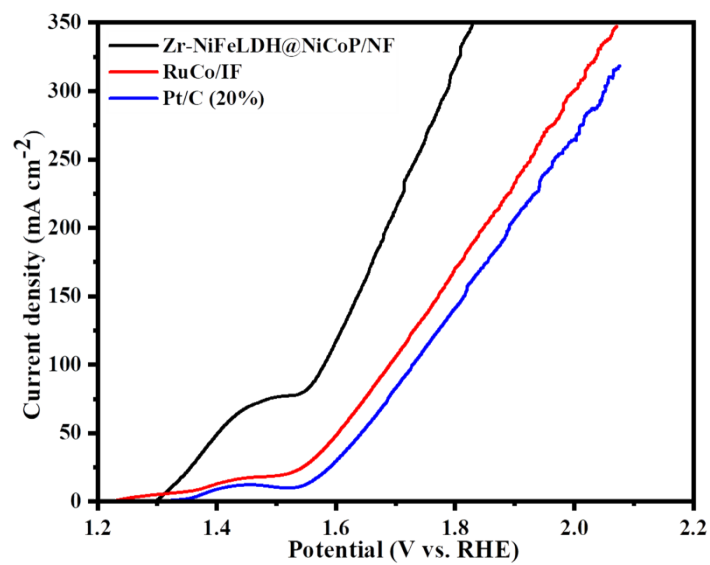

Fig. S12. The OER polarization curves of the Zr-NiFeLDH@NiCoP/NF, RuCo/IF and Pt/C (20%).



**Table S4.** Calculated double layer capacitance ( $C_{dl}$ ), roughness factor ( $\sigma$ ) and normalized current density at overpotentials ( $\eta$ ) of 0 and 100 mV. The unit for capacitance and normalized current densities are  $\text{mF cm}^{-2}$  and  $\text{mA cm}^{-2}$ , respectively.

| Catalysts           | $C_{dl}$ | $\sigma$ | $j/\sigma$ at $\eta = 0$ mV | $j/\sigma$ at $\eta = 100$ mV |
|---------------------|----------|----------|-----------------------------|-------------------------------|
| Zr-NiFeLDH@NiCoP/NF | 12.25    | 281.25   | 0.00218                     | 0.0539                        |
| NiFeLDH@NiCoP/NF    | 6.53     | 163.25   | 0.00018                     | 0.0469                        |
| NF                  | 3.72     | 93       | 0.00008                     | 0.00658                       |

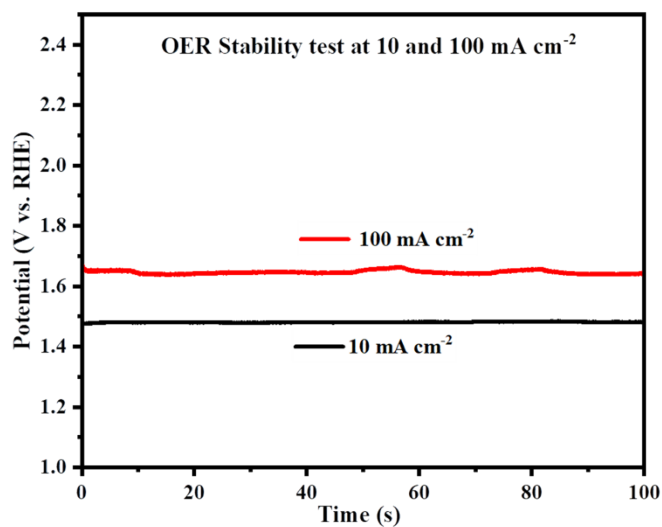

**Fig. S13.** The Zr-NiFeLDH@NiCoP/NF sample OER potential stability test at 10 and 100  $\text{mA cm}^{-2}$  current density for 100 h.

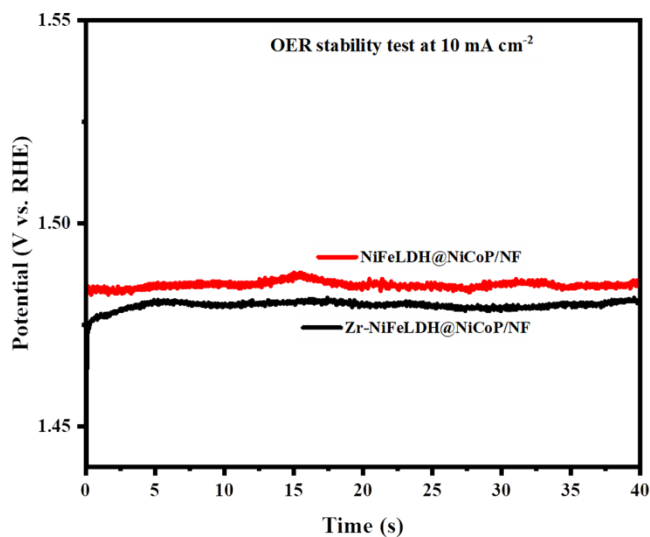

**Fig. S14.** OER stability test comparison at 10  $\text{mA cm}^{-2}$  for Zr-NiFeLDH@NiCoP/NF and NiFeLDH@NiCoP/NF.

**Table S5.** Comparison of OER performance for Zr-NiFeLDH@NiCoP/NF with other reported electrocatalysts in the alkaline media.

| Catalyst                                                      | Electrolyte<br>(KOH) | $\eta_{10}$ (mV)      | Tafel Slope<br>(mV/dec) | Stability (h)                                 | Ref.             |
|---------------------------------------------------------------|----------------------|-----------------------|-------------------------|-----------------------------------------------|------------------|
| <b>Zr-NiFeLDH@NiCoP/NF</b>                                    | <b>1M KOH</b>        | <b>92</b>             | <b>45.6</b>             | <b>100(j<sub>10</sub>and j<sub>500</sub>)</b> | <b>This Work</b> |
| Zr <sub>0.1</sub> Ni <sub>1.9</sub> P/NF                      | 1M KOH               | 239                   | 74                      | 100(j <sub>10</sub> and j <sub>100</sub> )    | S <sup>3</sup>   |
| Ni <sub>2</sub> P/NiMoP <sub>2</sub> /CC                      | 1M KOH               | 230                   | 138                     | 28(j <sub>10</sub> )                          | S <sup>4</sup>   |
| NiFe <sub>x</sub> P@NiCo-LDH/CC                               | 1M KOH               | 140                   | 97                      | 10(j <sub>38</sub> )                          | S <sup>6</sup>   |
| Zr-NiFe(OH) <sub>x</sub> /NFF                                 | 1M KOH               | 211                   | 45.12                   | 40h(j <sub>10</sub> )                         | S <sup>17</sup>  |
| Ni <sub>0.83</sub> Co <sub>0.17</sub> P                       | 1M KOH               | 295                   | 45                      | 25(j <sub>10</sub> )                          | S <sup>18</sup>  |
| Zr-NiCoLDH/NF                                                 | 1M KOH               | 233                   | 40.9                    | 25(j <sub>100</sub> )                         | S <sup>5</sup>   |
| NiFe LDH@NiFe                                                 | 1M KOH               | 201                   | 48.52                   | 25(j <sub>10</sub> )                          | S <sup>19</sup>  |
| Fe-Ni <sub>2</sub> P/N-GO                                     | 1M KOH               | 269                   | 72                      | 7(j <sub>100</sub> )                          | S <sup>20</sup>  |
| (Ru-Co)O <sub>x</sub> -350                                    | 1M KOH               | 265                   | 60                      | 20(j <sub>10</sub> )                          | S <sup>21</sup>  |
| NiSe@NiFe-LDH/NF                                              | 1M KOH               | 194                   | 58.2                    | 100(j <sub>100</sub> )                        | S <sup>22</sup>  |
| Ni <sub>2</sub> Fe <sub>1</sub> -LDH/NF                       | 1 M KOH              | 239(j <sub>50</sub> ) | 64.1                    | 24(j <sub>10</sub> )                          | S <sup>23</sup>  |
| RuO <sub>2</sub> /NiFeLDH/NF                                  | 1 M KOH              | 226                   | 77.4                    | 12(j <sub>10</sub> & 50)                      | S <sup>11</sup>  |
| NiFe-LDH/MoS <sub>2</sub> -Ni <sub>3</sub> S <sub>2</sub> /NF | 1 M KOH              | 220(j <sub>50</sub> ) | 108                     | 24(j <sub>10</sub> )                          | S <sup>12</sup>  |
| NiFeLDH@NiCoP/NF                                              | 1 M KOH              | 220                   | 48.6                    | 100(j <sub>10</sub> )                         | S <sup>24</sup>  |

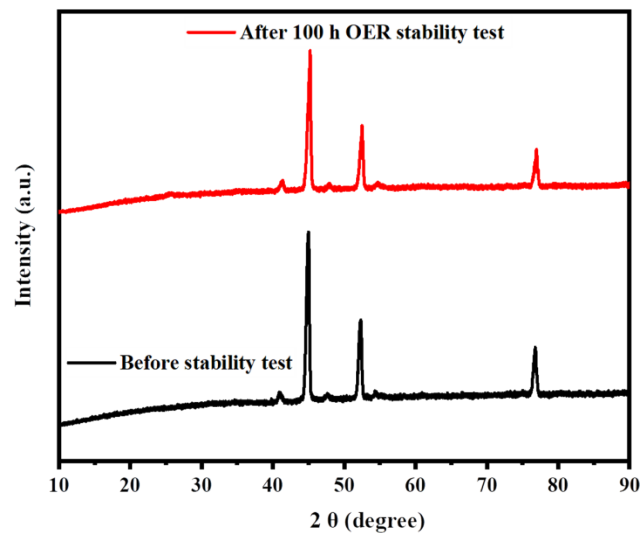

**Fig. S15.** XRD pattern comparison of the Zr-NiFeLDH@NiCoP/NF (a) before stability and (b) after OER stability for 100 h at  $10 \text{ mA cm}^{-2}$ .

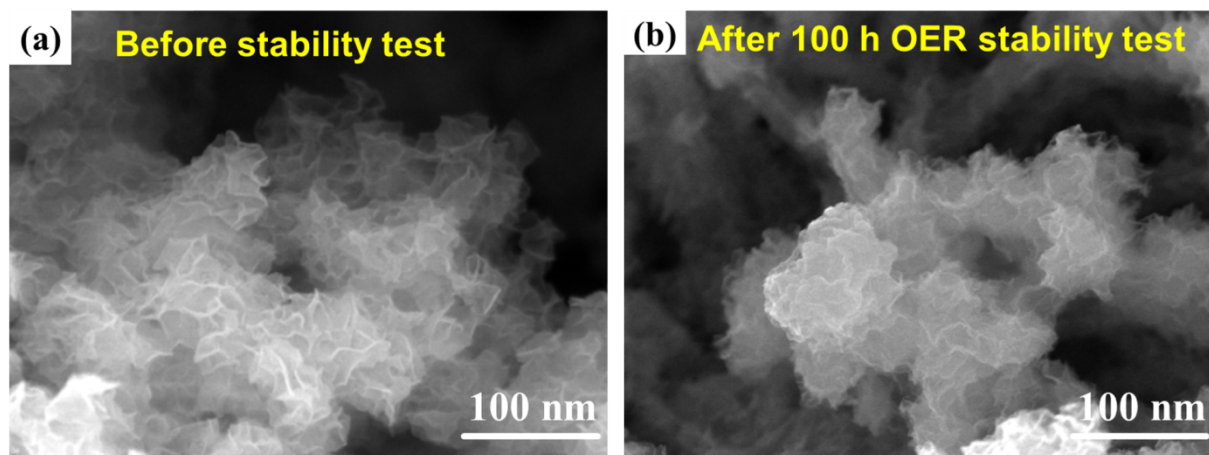

**Fig. S16.** SEM images of the Zr-NiFeLDH@NiCoP/NF (a) before stability and (b) after 100 h OER stability at current density of  $10 \text{ mA cm}^{-2}$ .

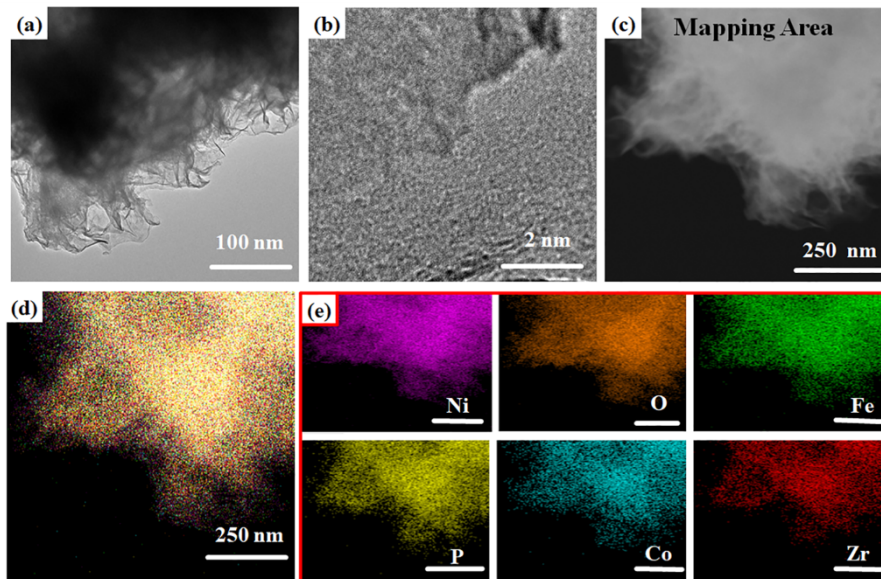

Fig. S17. The TEM analysis after OER stability tests under constant current density of  $10 \text{ mA cm}^{-2}$  for over 100 h.

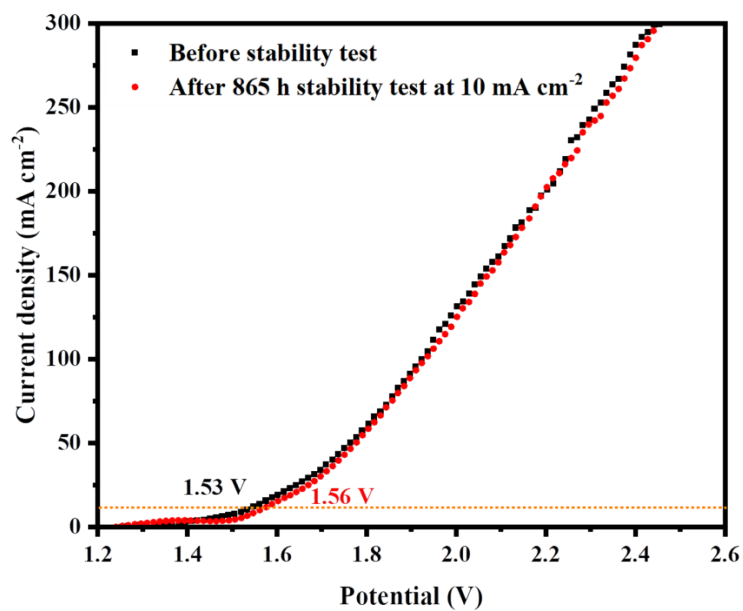

Fig. S18. The polarization curves of the electrode before and after 865 h stability test for overall water splitting at  $10 \text{ mA cm}^{-2}$ .

**Table S6.** Comparison of overall water splitting for Zr-NiFeLDH@NiCoP/NF with other reported electrocatalysts in the alkaline media.

| <b>Catalyst</b>                                                        | <b>Electrolyte</b> | <b>Cell Voltage <math>j_{10}</math></b> | <b>Stability</b>                | <b>Ref.</b>      |
|------------------------------------------------------------------------|--------------------|-----------------------------------------|---------------------------------|------------------|
|                                                                        | <b>(KOH)</b>       | <b>(V)</b>                              | <b>(h)</b>                      |                  |
| <b>Zr-NiFeLDH@NiCoP/NF</b>                                             | <b>1 M KOH</b>     | <b>1.53</b>                             | <b>865(<math>j_{10}</math>)</b> | <b>This Work</b> |
| 3DOM-Ni <sub>2</sub> P/Fe <sub>x</sub> P                               | 1 M KOH            | 1.54                                    | 30( $j_{10}$ )                  | S <sup>1</sup>   |
| Zr <sub>0.06</sub> Co <sub>0.9</sub> P/CC                              | 1M KOH             | 1.53                                    | 24( $j_{10}$ )                  | S <sup>25</sup>  |
| CoFeZr oxides/NF                                                       | 1M KOH             | 1.63                                    | 12( $j_{10}$ )                  | S <sup>26</sup>  |
| Ru <sub>S<sub>A</sub></sub> CoFe <sub>2</sub> /G                       | 1 M KOH            | 1.48                                    | 100 ( $j_{100}$ )               | S <sup>27</sup>  |
| Zr <sub>0.1</sub> Ni <sub>1.9</sub> P/NF                               | 1M KOH             | 1.5                                     | 50( $j_{10}$ )                  | S <sup>3</sup>   |
| Ni <sub>2</sub> P/NiMoP <sub>2</sub> /CC                               | 1M KOH             | 1.59                                    | 28( $j_{10}$ )                  | S <sup>4</sup>   |
| NiFeLDH@NiCoP/NF                                                       | 1M KOH             | 1.57                                    | 100( $j_{10}$ )                 | S <sup>24</sup>  |
| Ni <sub>3</sub> S <sub>2</sub> /NF                                     | 1 M KOH            | ~1.76                                   | 150( $j_{13}$ )                 | S <sup>28</sup>  |
| Ru-NiFeP/NF                                                            | 1 M KOH            | 1.47                                    | 120( $j_{10}$ )                 | S <sup>29</sup>  |
| Ni <sub>0.83</sub> Co <sub>0.17</sub> P                                | 1 M KOH            | 1.60                                    | 25( $j_{10}$ )                  | S <sup>18</sup>  |
| CoFeZr/NF                                                              | 1M KOH             | 1.66                                    | 20( $j_{15}$ )                  | S <sup>5</sup>   |
| (Ru-Co)O <sub>x</sub> -350                                             | 1 M KOH            | 1.57                                    | 20( $j_{10}$ )                  | S <sup>21</sup>  |
| W-FeNi <sub>2</sub> S <sub>4</sub> /Ni <sub>3</sub> S <sub>2</sub> /NF | 1 M KOH            | 1.52                                    | 24( $j_{10}$ )                  | S <sup>8</sup>   |
| Ni <sub>2</sub> P@FePO <sub>x</sub>                                    | 1 M KOH            | 1.51                                    | 100( $j_{10}$ )                 | S <sup>10</sup>  |
| RuO <sub>2</sub> /NiFeLDH/NF                                           | 1 M KOH            | 1.52                                    | 100h( $j_{10}$ )                | S <sup>11</sup>  |
| NiFe-LDH/MoS <sub>2</sub> -Ni <sub>3</sub> S <sub>2</sub> /NF          | 1 M KOH            | 1.50                                    | 50( $j_{10}$ to 50)             | S <sup>12</sup>  |

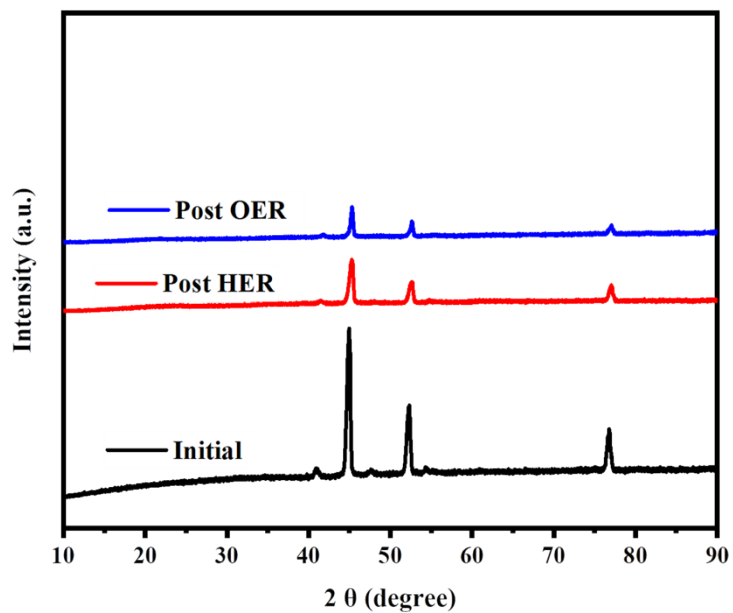

**Fig.S19.** XRD pattern comparison of the Zr-NiFeLDH@NiCoP/NF as a cathode (HER) and anode (OER) for 865 h overall water splitting at  $10 \text{ mA cm}^{-2}$ .

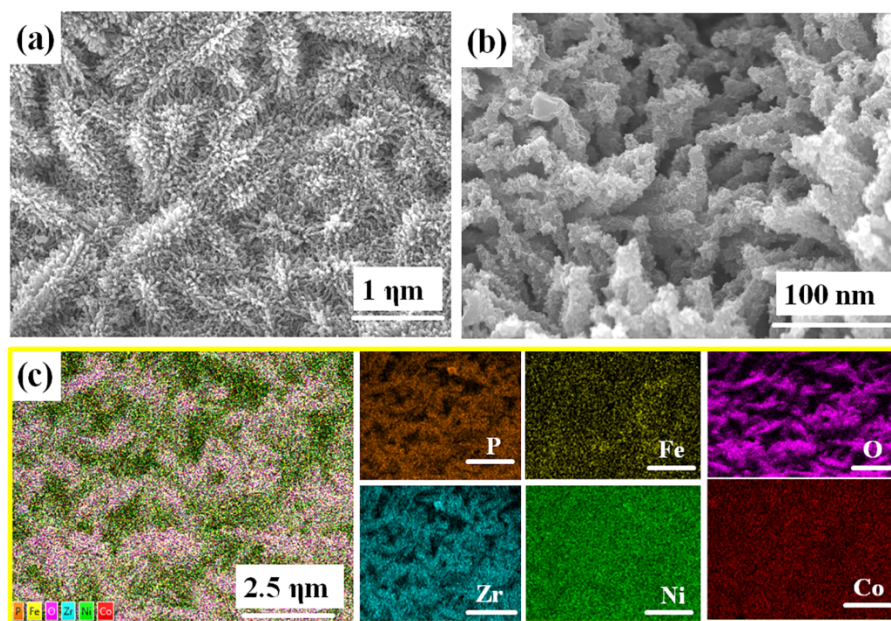

**Fig.S20.** SEM images of the Zr-NiFeLDH@NiCoP/NF after 865 h overall water splitting as a cathode. (a-b) the corresponding high-resolution SEM images, (c) EDX mapping area and elemental mapping images.

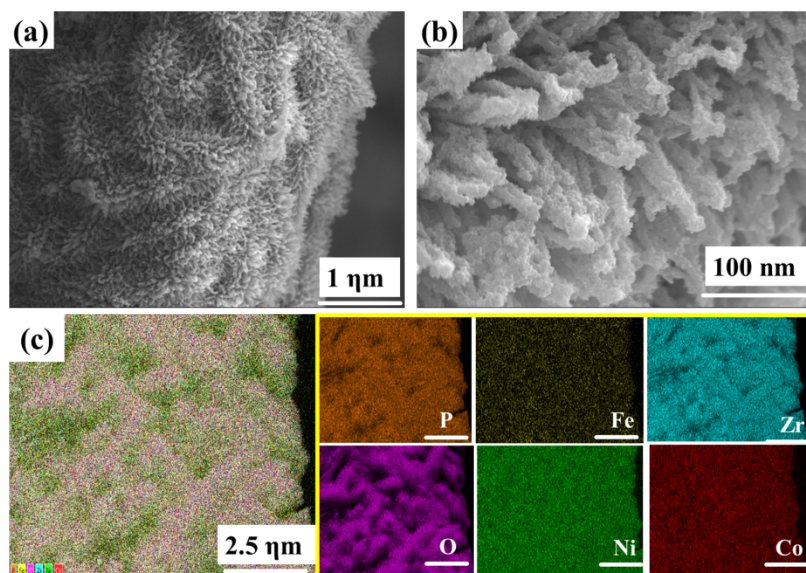

**Fig.S21.** SEM images of the Zr-NiFeLDH@NiCoP/NF after overall water splitting as an anode (OER). (a-b) the corresponding high-resolution SEM images, (c-e) EDX mapping area and elemental mapping images.

**Table S7.** The elements contents of different electrocatalysts from XPS analysis.

| Sample/Elements                                                                  | Ni 2p         | Fe 2p         | Co 2p         | P 2p          | Zr3d          |
|----------------------------------------------------------------------------------|---------------|---------------|---------------|---------------|---------------|
| Zr-NiFeLDH@NiCoP/NF<br>(Before stability)                                        | 856.37/874.14 | 709.89/714.44 | 781.17/797.10 | 129.64/133.25 | 182.24/184.49 |
| Zr-NiFeLDH@NiCoP/NF<br>(After 865 h HER stability at<br>10 mA cm <sup>-2</sup> ) | 856.11/873.87 | 710.73/715.34 | 780.84/796.00 | 129.07/134.99 | 181.72/184.39 |
| Zr-NiFeLDH@NiCoP/NF<br>(After 865 h OER stability at<br>10 mA cm <sup>-2</sup> ) | 855.22/873.82 | 709.83/714.41 | 779.81/794.98 | 128.65/132.40 | 181.61/184.20 |

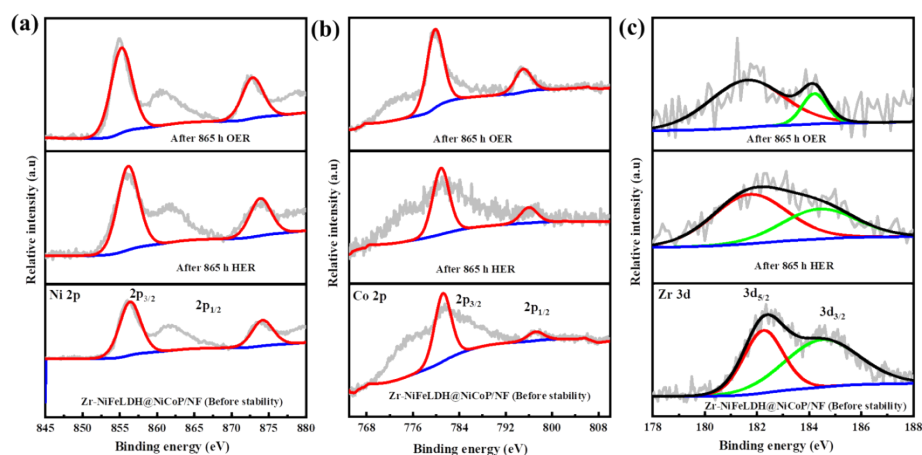

Fig. S22. The high-resolution XPS spectra of Zr-NiFeLDH@NiCoP/NF after 865 h stability test. (a) Ni 2p, (b) Co 2p (c) Zr 3d.

## References

1. W. Cao, R. Zhao, G. Liu, L. Wu and J. Li, *Applied Surface Science*, 2023, **607**, 154905.
2. X. Bu, R. Wei, W. Gao, C. Lan and J. C. Ho, *Journal of Materials Chemistry A*, 2019, **7**, 12325-12332.
3. H. Fan, J. Jia, D. Wang, J. Fan, J. Wu, J. Zhao and X. Cui, *Chemical Engineering Journal*, 2023, **455**, 140908.
4. L. Sun, S. Zhao, L. Sha, G. Zhuang, X. Wang and X. Han, *J Colloid Interface Sci*, 2023, **637**, 76-84.
5. W. Liu, K. Jiang, Y. Hu, Q. Li, Y. Deng, J. Bao and Y. Lei, *J Colloid Interface Sci*, 2021, **604**, 767-775.
6. Y. Zhang, X. Wu, G. Fu, F. Si, X.-Z. Fu and J.-L. Luo, *International Journal of Hydrogen Energy*, 2022, **47**, 17150-17160.
7. X. Zang, X. Zhang and J. Guo, *Materials Letters*, 2021, **285**, 129057.
8. J. Jiang, H. Su, S. Song, W. Liu, N. Li, Y. Gao and L. Ge, *Nano Research*, 2023, **16**, 12116-12125.
9. X. Lyu, Y. Zhang, X. Wang, H. Chen, S. Li, W. Zhang, Y. Hu, F. Li, D. Li and D. Yang, *Materials Today Sustainability*, 2023, **21**, 100295.
10. F. S. Zhang, J. W. Wang, J. Luo, R. R. Liu, Z. M. Zhang, C. T. He and T. B. Lu, *Chem Sci*, 2018, **9**, 1375-1384.
11. Q. Chen, Z. Kang, S. Luo, J. Li, P. Deng, C. Wang, Y. Hua, S. Zhong and X. Tian, *International Journal of Hydrogen Energy*, 2023, **48**, 8888-8897.
12. S. Wang, X. Ning, Y. Cao, R. Chen, Z. Lu, J. Hu, J. Xie and A. Hao, *Inorg Chem*, 2023, **62**, 6428-6438.
13. K. L. Xiaodong Yan Lihong Tian, Samuel Atkins, Haifeng Zhao, James Murowchick, Lei Liu, and Xiaobo Chen, *Advanced Functional Materials* 2016.



14. Z. Wang, S. Zeng, W. Liu, X. Wang, Q. Li, Z. Zhao and F. Geng, *ACS Appl Mater Interfaces*, 2017, **9**, 1488-1495.
15. T. Bhowmik, M. K. Kundu and S. Barman, *ACS Applied Energy Materials*, 2018, **1**, 1200-1209.
16. L. Yu, H. Zhou, J. Sun, F. Qin, D. Luo, L. Xie, F. Yu, J. Bao, Y. Li, Y. Yu, S. Chen and Z. Ren, *Nano Energy*, 2017, **41**, 327-336.
17. S. Song, Y. Wang, X. Tian, F. Sun, Y. Yuan, W. Li and J. Zang, *Applied Surface Science*, 2023, **607**, 155043.
18. S. Battiato, L. Bruno, A. L. Pellegrino, A. Terrasi and S. Mirabella, *Catalysis Today*, 2023, **423**, 113929.
19. P. Wang, Y. Lin, Q. Xu, Z. Xu, L. Wan, Y. Xia and B. Wang, *ACS Applied Energy Materials*, 2021, **4**, 9022-9031.
20. M. Yang, R. Zhao, Y. Liu and H. Lin, *CrystEngComm*, 2022, **24**, 1189-1194.
21. C. Wang, H. Shang, J. Li, Y. Wang, H. Xu, C. Wang, J. Guo and Y. Du, *Chemical Engineering Journal*, 2021, **420**, 129805.
22. W. Bao, C. Yang, T. Ai, J. Zhang, L. Zhou, Y. li, X. Wei, X. Zou and Y. Wang, *Fuel*, 2023, **332**.
23. L. Wang, D. Liu, Z. Zhang, Y. Li, J. Liu, Y. Yang, B. Xue and F. Li, *Journal of Alloys and Compounds*, 2023, **934**, 167846.
24. H. Zhang, X. Li, A. Hähnel, V. Naumann, C. Lin, S. Azimi, S. L. Schweizer, A. W. Maijenburg and R. B. Wehrspohn, *Advanced Functional Materials*, 2018, **28**, 1706847.
25. H. Fan, D. Jiao, J. Fan, D. Wang, B. Zaman, W. Zhang, L. Zhang, W. Zheng and X. Cui, *Journal of Energy Chemistry*, 2023, **83**, 119-127.
26. L. Huang, D. Chen, G. Luo, Y. R. Lu, C. Chen, Y. Zou, C. L. Dong, Y. Li and S. Wang, *Adv Mater*, 2019, **31**, e1901439.
27. J. Lee, A. Kumar, T. Yang, X. Liu, A. R. Jadhav, G. H. Park, Y. Hwang, J. Yu, C. T. K. Nguyen, Y. Liu, S. Ajmal, M. G. Kim and H. Lee, *Energy & Environmental Science*, 2020, **13**, 5152-5164.
28. L. L. Feng, G. Yu, Y. Wu, G. D. Li, H. Li, Y. Sun, T. Asefa, W. Chen and X. Zou, *J Am Chem Soc*, 2015, **137**, 14023-14026.
29. Y. Lin, M. Zhang, L. Zhao, L. Wang, D. Cao and Y. Gong, *Applied Surface Science*, 2021, **536**, 147952.
